# Supplementary material for: Safety and efficacy of SNK01 (autologous natural killer cells) in combination with cytotoxic chemotherapy and/or cetuximab after failure of prior tyrosine kinase inhibitor in non-small cell lung cancer: non-clinical mouse model and phase I/IIa clinical study
Source: PubMed Central journal article supplement — J Immunother Cancer. 2024 Mar 27;12(3):e008585. doi: 10.1136/jitc-2023-008585 (PMC10982808; doi:10.1136/jitc-2023-008585), 2024-03-27
Supplement: jitc-2023-008585supp001.pdf [file jitc-2023-008585supp001.pdf]

1 **SUPPLEMENTAL MATERIALS**

2

3 **Title: The safety and efficacy of SNK01 (autologous natural killer cells) in combination**  
4 **with cytotoxic chemotherapy and/or cetuximab after failure of prior tyrosine kinase**  
5 **inhibitor in non-small cell lung cancer: nonclinical mouse model and phase I/IIa clinical**  
6 **study**

7

8 Myeong Geun Choi<sup>1,2\*</sup>, Gun Woo Son<sup>3\*</sup>, Mi Young Choi<sup>3</sup>, Jae Seob Jung<sup>4</sup>, Jin Kyung Rho<sup>5</sup>,  
9 Wonjun Ji<sup>1</sup>, Byeong Gon Yoon<sup>3</sup>, Jong-Min Jo<sup>3</sup>, Yong Man Kim<sup>4</sup>, Dae-Hyun Ko<sup>6</sup>, Jae Cheol  
10 Lee<sup>7†</sup>, Chang-Min Choi<sup>1,7†</sup>

11

12 <sup>1</sup> Department of Pulmonary and Critical Care Medicine, Asan Medical Center, University of  
13 Ulsan College of Medicine, Seoul, Korea

14 <sup>2</sup> Division of Pulmonary and Critical Care Medicine, Department of Internal Medicine,  
15 Mokdong Hospital, College of Medicine, Ewha Womans University, Seoul, Korea

16 <sup>3</sup> C&SR Inc., Uiwang, Korea

17 <sup>4</sup> NKMAX Co., Ltd., Seongnam, Korea

18 <sup>5</sup> Department of Biochemistry and Molecular Biology, Asan Medical Center, University of  
19 Ulsan College of Medicine, Seoul, Korea

20 <sup>6</sup> Department of Laboratory Medicine, Asan Medical Center, University of Ulsan College of  
21 Medicine, Seoul, Korea

22 <sup>7</sup> Department of Oncology, Asan Medical Center, University of Ulsan College of Medicine,  
23 Seoul, Korea

24

25 \* Both authors equally contributed to this study

26

27 †**Corresponding Authors:**

28 **Chang-Min Choi, MD, PhD**

29 Department of Pulmonary and Critical Care Medicine, Asan Medical Center,

30 University of Ulsan College of Medicine, 88, Olympic-ro 43-gil, Songpa-gu,

31 Seoul 05505, South Korea

32 Tel.: 82-2-3010-5902

33 Fax: 82-2-3010-6968

34 E-mail: ccm@amc.seoul.kr

35

36 **Jae Cheol Lee, MD, PhD.**

37 Department of Oncology, Asan Medical Center,

38 University of Ulsan College of Medicine, 88, Olympic-ro 43-gil, Songpa-gu,

39 Seoul 05505, South Korea

40 Tel.: 82-2-3010-3208

41 Fax: 82-2-3010-6968

42 Email: jclee@amc.seoul.kr

## 43 SUPPLEMENTAL METHODS

### 44 1. Autologous natural killer (NK) cell isolation and expansion

45 The manufacturing and testing procedures adopted to produce *ex vivo* expanded NK cells for  
46 nonclinical and clinical uses were performed under good manufacturing practice conditions  
47 (NKMAX Co., Ltd., Seongnam, Korea). Peripheral blood mononuclear cells (PBMCs) were  
48 collected from the peripheral blood of the enrolled patients and then used for NK cell  
49 expansions as previously described with some modification. Briefly, the CD56<sup>+</sup> cells were  
50 isolated from PBMCs using CliniMACS CD56 microbeads (Miltenyi Biotech GmbH, NRW,  
51 Germany) according to the manufacturer's instructions. The isolated CD56<sup>+</sup> cells were then  
52 cultured in RPMI-1640 medium (WELGENE Inc.) supplemented with 10% FBS (Hyclone,  
53 Tauranga, New Zealand), 20 µg/mL gentamicin (GIBCO, Grand Island, NY), g-irradiated  
54 (100 Gy) KL-1 and LCL feeders, 500 IU/mL interleukin (IL)-2 (PROLEUKIN, Novartis,  
55 Basel, Switzerland), and 50 ng/mL IL-21 (NKMAX Co.).

56 The growing NK cells were sub-cultured every 3-4 days using fresh RPMI-1640  
57 medium containing IL-2. After 14 days of culture, the cells were harvested and subjected  
58 immediately to re-expansion by adding feeder cells in the presence of cytokines. Alternatively,  
59 they were cryopreserved for subsequent timely re-expansion as per the treatment schedule.  
60 The restimulated NK cells were sub-cultured every 3-4 days and cultured for an additional  
61 17-18 days. The cells were harvested on either day 31 or 32 of total expansion excluding the  
62 cryopreservation period, then washed twice with phosphate-buffered saline (PBS;  
63 WELGENE Inc.) and once with Hartmann's solution (DAI HAN PHARM., Ansan, Korea),  
64 and formulated in 100 mL Hartmann's solution containing 1% human serum albumin  
65 (Albumin inj.; GREEN CROSS, Cheongju, Korea) and IL-2 (500 IU/mL) with the cell  
66 number of  $2 \times 10^9$  cells.

67 The criteria for the release of final NK cell products included the absence of microbial

68 contamination (bacteria, fungus, virus, and mycoplasma),  $\geq 80\%$  viability in a trypan blue  
69 exclusion assay,  $\geq 50\%$  cytotoxicity against K562 target cells at the effector to target cell (E:T)  
70 ratio of 10:1,  $\leq 0.5$  EU/mL endotoxin level, and immune phenotyping via flow cytometric  
71 analysis proving the expression of the NK cell markers ( $CD56^+/CD3^-$ ) ( $\geq 80\%$ ) and the  
72 absence of CD14, CD3, and CD20 ( $\leq 5\%$  each). Only final NK cell products that met all the  
73 release criteria were shipped to the clinic at 2-8°C and administered to the subjects via  
74 intravenous injection over a period of  $45 \pm 15$  minute/100 mL ( $2 \times 10^9$  cells). The NK cell  
75 products used for animal experiments were prepared as excess from the clinical NK cells  
76 mentioned above, and the same criteria for release were applied.

77

## 78 **2. Establishment of cell line-derived xenograft (CDX)-humanized mouse model**

### 79 *Human CD34+ transplanted humanized mice*

80 Human umbilical cord blood-derived hematopoietic stem cells (HSCs) were purchased from  
81 Lonza Group, Ltd. (Walkersville, MD, USA). Four to five weeks old of fourteen NOD.Cg-  
82 Prkdc<sup>scid</sup>IL2rg<sup>tm1Wjl</sup>/SzJ (NSG) mice were preconditioned with busulfan. The liquid busulfan  
83 was intraperitoneally (i.p.) injected into NSG mice (20mg/kg body weight) 24-48 hours prior  
84 to HSC transplantation. 24 and 48 hours later,  $1 \times 10^6$  human CD34-positive HSCs in 100 $\mu$ l  
85 PBS were transplanted into the object's tail vein.

86

### 87 *Humanized animal-based non-small cell lung cancer (NSCLC) xenograft tumor and CDX* 88 *mice*

89 To generate NSCLC xenograft tumor model,  $1.5 \times 10^6$  osimertinib-resistant lung cancer cells  
90 (PC-9/OR) were implanted in the right intercostal of 12 weeks post-humanized NSG mice.  
91 All PC-9/OR cells were cellular DiD-fluorescence labeling performed according to the  
92 manufacturer's (Vybrant™ DiD cell-labeling) protocols (Thermo Fisher Scientific, USA),

93 which procedure was cellular labeling for visualization prior to cell transplantation. For  
94 human xenograft tumor experiments, treatment started when implanted tumor reached a  
95 volume of 100 to 200mm<sup>3</sup>. A control group of this experiment received an intravenous  
96 injection method of the saline vehicle. Cetuximab (0.4mg/kg) and NK cells ( $2 \times 10^7$ /cells)  
97 were injected intravenously following the same method and volume described above.

98

#### 99 *Analysis of engraftment with flow cytometry*

100 Mice peripheral blood from retro-orbital sinus were analyzed by 12 weeks after hCD34+  
101 HSCs transplantation. Single-cell suspensions were prepared by standard procedure and were  
102 stained with the following antibodies: mouse CD45-anemonia majano cyan fluorescent  
103 protein (AmCyan), hCD45-allophycocyanin (APC), hCD3-allophycocyanin violet (APC-Vio),  
104 hCD4-pacific blue (Bio-Blue), hCD8-Phycoerythrin-Cyanine7 (PE-Cy7), hCD19-  
105 Phycoerythrin (PE), and hCD56 (fluorescein isothiocyanate [FITC]), all antibodies were  
106 purchased from Miltenyi Biotec. One million events were acquired per sample and analyzed  
107 with BD FACSCanto™ Flow Cytometry System. FlowJo (software ver.10.8.1) packages  
108 were used for data analysis.

109

#### 110 *Immunohistochemistry (IHC)*

111 The mice were sacrificed 1 day after the 5th treatment injection or on day 30 in the control  
112 group. The relationship between tumor cells and NK cells of NSCLC CDX-humanized  
113 mouse model was evaluated by IHC staining using cancer markers (EGFR/Vimentin) and NK  
114 cell markers (CD3/CD56), which had been cell developmental factors as tumor progression  
115 and NK cells. Tumor tissues harvested from humanized NSG mice were fixed with 4%  
116 paraformaldehyde for 24 hours and paraffin embedding process using an automated tissue  
117 processing machine (Leica, Biosystems). Then, 5µm serial sections were prepared and

118 analyzed for IHC. Paraffin-embedded using fully automated rotary microtome (Leica  
119 RM2255) and immune-histological processing were deparaffinized and rehydrated by xylene  
120 and ethanol preparation. Specimens were then washed and performed enzyme retrieval using  
121 0.1% trypsin in PBS for 30min at 37°C. After Blocking with 1% goat anti-serum for 1hr,  
122 specimens were incubated with primary antibodies against monoclonal mouse and rabbit anti-  
123 human cancerous-specific antigen EGFR (1:200, Thermo, Cat no-MA5-13070), CD3(1:100,  
124 NOVUS, Cat no-NB600-1441), CD56(1:50, R&D system, Cat no-AF2408) or polyclonal  
125 rabbit anti-human vimentin (1:200, Genetex, Cat no-GTX85471), and tissues were incubated  
126 overnight at 4°C. All specimens were then incubated in the secondary antibodies, anti-  
127 rabbit/mouse/goat/chicken-Ig-Fluorescent conjugated Alexa flour 488, 550, and 594, for 2hs  
128 room temperature. For nuclear staining, whole mounting was done using a DAPI-conjugated  
129 mounting medium (VECTASHEILD, Burlingame, CA). Lastly, the expression of the markers  
130 was using a fluorescence-attached microscope.

131

### 132 **3. Analysis of the characteristics of autologous natural killer cells from patients**

#### 133 *Flow cytometry*

134 NK cells from the initial and final doses of each patient were analyzed. The NK cells were  
135 suspended in cell staining buffer solution (1% bovine serum albumin/0.05% sodium azide in  
136 PBS) and incubated with the following antibodies in the dark at 4°C for 20 minutes [CD56-  
137 FITC, CD3-PE, CD20-PerCP/Cy5.5, CD14-APC, CD16-APC, CD314 (NKG2D)-APC,  
138 CD159c (NKG2C)-APC, CD158a (KIR2DL1)-APC, CD184 (CXCR4)-PerCP/Cy5.5 (BD  
139 Biosciences, San Jose, CA), CD158b (KIR2LD2/DL3)-APC, CD158e(KIR3DL1)-APC  
140 (Miltenyi Biotec), CD337 (NKp30)-PerCP/Cy5.5, CD183 (CXCR3)-PerCP/Cy5.5, CD336  
141 (NKp44)-PerCP/Cy5.5, CD335 (NKp46)-PerCP/Cy5.5, CD159a (NKG2A)-APC, CD244  
142 (2B4)-PerCP/Cy5.5 (BioLegend, San Diego, CA)]. The NK cells were then washed twice and

143 re-suspended in cell staining buffer solution. Control antibody (isotype control) for each  
144 staining antibody was used to determine the background level of non-specific binding as a  
145 negative control. Samples were measured using a flow cytometer (FACSLyric™, BD  
146 Biosciences) and analyzed by FACSuite v1.2 software (BD Biosciences).

147 NK cells ( $1 \times 10^6$ ) were washed with cell staining buffer solution and re-suspended. The NK  
148 cells were stained with anti-CD56 antibodies that had been conjugated with Alexa Fluor®  
149 488 for 20 minutes in dark at 4°C and then washed twice with cell staining buffer solution.  
150 The NK cells were fixed in dark at room temperature for 30 minutes using 100 µL of fixation  
151 buffer (BioLegend) to increase cell permeability. The NK cells were reacted with antibodies  
152 [IFN-γ-PE, TNF-α-PerCP/Cy5.5 (BioLegend)] in dark for another 20 minutes, measured  
153 using a flow cytometer, and analyzed by FACSuite v1.2 software.

154

#### 155 *Degranulation*

156 For the NK cell degranulation assay, the NK cells from the first and final doses of each  
157 patient were incubated in media containing the anti-CD107a-APC antibody (BioLegend) or  
158 isotype control. Degranulation was induced by adding K562 target cells (E:T ratio=1:1) or  
159 phorbol 12-myristate 13-acetate plus ionomycin as a positive control, respectively (both from  
160 Sigma, St. Louis, MO). In the negative control, complete culture medium was added instead  
161 of degranulation stimuli. The NK cells were incubated for 2 hours, and subsequently  
162 monensin (Sigma) was added to the medium before the next 3-hour incubation to prevent the  
163 degradation of internalized CD107a. Then, the cells were washed and stained with the anti-  
164 CD56-FITC antibody and analyzed using the FACS flow cytometer (BD FACSLyric™).

165

#### 166 *Cytotoxicity assay*

167 The cytotoxicity of the NK cells against the target cells (K562 and NSCLC cell lines) was

168 assessed using a fluorometric cytotoxicity assay. The cytotoxicity of NK cell against K562,  
169 PC9, and PC9/OR was analyzed for all doses of NK cells from each patient, and the  
170 cytotoxicity against HCC827 and HCC827/OR was measured for the first and final doses of  
171 NK cells from each patient. Each cell line was stained with 4 mM calcein-AM solution  
172 (Sigma-Aldrich, St. Louis, MO) for 30 minutes at 37°C followed by washing with RPMI  
173 1640 medium. The NK cells and target cells were mixed at the E:T ratio of 10:1, 3:1, 1:1, and  
174 0.5:1 in 96-well U-bottom plates. After a 4-hour incubation in a humidified incubator with 5%  
175 of CO<sub>2</sub>, 100 μL of supernatant was transferred to a new 96-well flat-bottom black plate.  
176 Fluorescence signal was measured using a SpectraMax M2 microplate reader (Molecular  
177 Devices, San Jose, CA), with excitation at 485 nm and emission detection at 525 nm. The  
178 percent specific lysis was calculated using the formula: (Test release - Spontaneous  
179 release)/(Maximum release - Spontaneous release) × 100.

180

#### 181 *Antibody-dependent cellular cytotoxicity (ADCC) assay*

182 ADCC was assessed by a fluorometric cytotoxicity assay for NK cells from the first and final  
183 doses of each patient. The target cells were stained with calcein AM, and  $1 \times 10^4$  cells were  
184 dispensed into each well of a U-bottom 96-well plate. Antibodies were added at a final  
185 concentration of 2.5 μg/mL, and NK cells were added at E:T ratios of 3:1, 1:1, and 0.5:1.  
186 After incubation at 37°C for 2 hours, the cytotoxicity against cancer cells was analyzed. For  
187 maximal release, the cells were lysed with 2% Triton X-100 without NK cells, while stained  
188 cancer cells were cultured without NK cells and used as a negative control. The cytotoxicity  
189 against cancer cells (expressed as percent of lysis) was calculated by the following formula:  
190 [(value obtained from the experimental group - value obtained from the negative  
191 control)/(value obtained from the positive control - value obtained from the negative control)]  
192 × 100 %.



193 **SUPPLEMENTAL RESULTS**

194 **1. Characteristics of the NK cell products**

195 To produce the *ex vivo* expanded NK cell products for nonclinical and clinical uses, the  
196 CD56<sup>+</sup> cells were isolated from PBMCs of 12 patients. These CD56<sup>+</sup> cells were cultured for  
197 31 or 32 days in the presence of feeder cells and cytokines for expansion. The cells were  
198 harvested and then subjected to either re-expansion for the first dose or cryopreservation for  
199 subsequent re-expansion for the second to last doses. The fresh or cryopreserved cells were  
200 culture-expanded for 17-18 days in the presence of feeder cells and cytokines to generate  
201 clinical NK cells product (final product). In the freshly isolated CD56<sup>+</sup> cells from the  
202 peripheral blood of the enrolled patients, the proportion of NK cells (CD56<sup>+</sup>CD3<sup>-</sup>) varied  
203 among donors (77.82 ± 12.60%). However, the final products were mainly composed of NK  
204 cells (99.81 ± 0.22%) with a minimal contamination of CD3<sup>+</sup> T cells (0.15 ± 0.20%), CD14<sup>+</sup>  
205 monocytes (0.32 ± 0.10%), and CD20<sup>+</sup> B cells (0.01 ± 0.01%) (Supplemental Figure 3A). In  
206 the expansion culture, the NK cells were highly expanded (4,462,189 ± 2,063,228-fold) with  
207 high viability (98.00 ± 1.00%) (Supplemental Figure 3B–C), which was sufficient for  
208 multiple injections in all donors. The culture-expanded NK cells from all donors highly  
209 expressed activating receptors, including NKG2D (99.19 ± 1.28%), CD16 (91.02 ± 5.38%),  
210 NKp30 (93.14 ± 7.92%), NKp46 (84.34 ± 6.96%), CD244 (2B4) (99.60 ± 0.30%), inhibitory  
211 receptor NKG2A (83.01 ± 12.69%), and chemokine receptor CXCR3 (83.46 ± 7.92%),  
212 whereas the expression level of inhibitory receptors, CD158a (KIR2DL1; 11.45 ± 9.66%),  
213 CD158b (KIR2DL2/L3; 17.01 ± 9.90%), and CD158e (KIR2DL1; 17.88 ± 14.25%), was  
214 relatively low (Supplemental Figure 3D). When the cytotoxic activity of culture-expanded  
215 NK cells against the K562 cells was examined 1 day before injection day, the NK cell  
216 products from all patients exerted a strong cytotoxic activity against K562 even at a low E:T  
217 ratio of 0.5:1 (58.93 ± 5.23%) (Supplemental Figure 3E). In addition, NK cell degranulation

218 activity (CD107a expression) was upregulated when cocultured with K562 cells ( $44.08 \pm$   
219  $5.72\%$ ) (NK + K562) or treated with phorbol 12-myristate 13-acetate/ionomycin ( $91.72 \pm$   
220  $3.95\%$ ) (NK + P/I) (Supplemental Figure 3F). Furthermore, the expression level of IFN-g  
221 ( $17.40 \pm 3.04\%$ ) and TNF-a ( $16.51 \pm 2.48\%$ ) were significantly upregulated upon stimulation  
222 with K562 cells (Supplemental Figure 3G).

223 Previous experiment showed that epidermal growth factor receptor (EGFR) tyrosine  
224 kinase inhibitor (TKI) (gefitinib and osimertinib)-resistant NSCLC cell lines were more  
225 sensitive to NK cell-mediated killing compared to their parent cell lines (data not shown).  
226 Thus, we investigated if clinical NK cell products also have better cytotoxic activity against  
227 osimertinib-resistant NSCLC cell lines PC-9/OR and HCC827/OR than their corresponding  
228 parent cells PC-9 and HCC827 cells. The NK cell products showed higher cytotoxicity  
229 against osimertinib-resistant PC-9/OR and HCC827/OR than their parent cells PC-9 and  
230 HCC827, respectively (Supplemental Figure 4). Such results were observed across all NK  
231 cell -to-cancer cell ratios (E:T ratio) regardless of donors. After 4 hours of co-culture at an  
232 E:T ratio of 3:1, the average cytotoxicity of all NK cell products was  $58.89 \pm 9.19\%$  against  
233 PC9 cells,  $85.20 \pm 6.33\%$  against PC9/OR,  $42.55 \pm 10.88\%$  against HCC827, and  $66.32 \pm$   
234  $12.30\%$  against HCC827/OR, confirming that osimertinib-resistant NSCLC cell lines are  
235 more sensitive NK cell-mediated killing.

236 NK cells are well known to mediate ADCC through CD16 that was highly expressed  
237 on the NK cell products (Supplemental Figure 3D). Cetuximab exhibits anticancer effects by  
238 blocking the dimerization of EGFR through murine/human chimeric monoclonal Ab that  
239 binds to the extracellular domain III of EGFR and by inducing ADCC responses *in vivo*. Thus,  
240 we evaluated the ADCC effect of NK cell products against osimertinib-TKI-resistant NSCLC  
241 cells PC9/OR and HCC827/OR with cetuximab. Flow cytometric analysis showed that EGFR  
242 was highly expressed (over 99%) on all cell lines (data not shown). PC9/OR and its parent

243 cell PC9 were stained with calcein AM and co-cultured with NK cell products at an E:T ratio  
244 of 3:1 after treating with cetuximab for two hours. A control group treated with only media  
245 (NK) instead of cetuximab and a control group treated with isotype IgG antibodies (NK +  
246 IgG) exhibited similar cytotoxicity against PC9 and PC9/OR cells (Supplemental Figure 5A).  
247 However, compared to these two groups, the cytotoxicity of NK cell products was  
248 significantly increased against both cells by ADCC when they are pretreated with cetuximab.  
249 A similar increase in the cytotoxicity of the NK cell products in response to cetuximab was  
250 also observed in HCC827 and HCC827/OR cells (Supplemental Figure 5B). Therefore,  
251 combined use of NK cell product and cetuximab can further improve the cytotoxicity against  
252 EGFR<sup>+</sup> NSCLC cells via ADCC effect, irrespective of sensitivity to- EGFR-TKI.

253 Overall, our study successfully generated a significant quantity of clinical-grade NK  
254 cell products with minimal contamination from other immune cells by employing *ex vivo*  
255 expansion techniques, utilizing two feeder cell types and cytokines. These NK cell products  
256 exhibited potent cytotoxic activity against osimertinib-resistant NSCLC cells through both  
257 natural killing activity and ADCC. The resulting NK cell products hold promise for multiple  
258 administration regimens in clinical settings, highlighting their potential as an effective  
259 therapy against resistant NSCLC.

260

261 **SUPPLEMENTAL FIGURES**

262 **Supplemental Figure 1. Changes in human-specific CD3 positive/negative-dependent**  
 263 **expression of NK cells during tumorigenesis and treatment in cell line-derived**  
 264 **xenograft-humanized mice. (A) NK cells (CD45+/CD56+/CD3-). (B) NKT cells**  
 265 **(CD45+/CD56+/CD3+).**

266

**A**

267

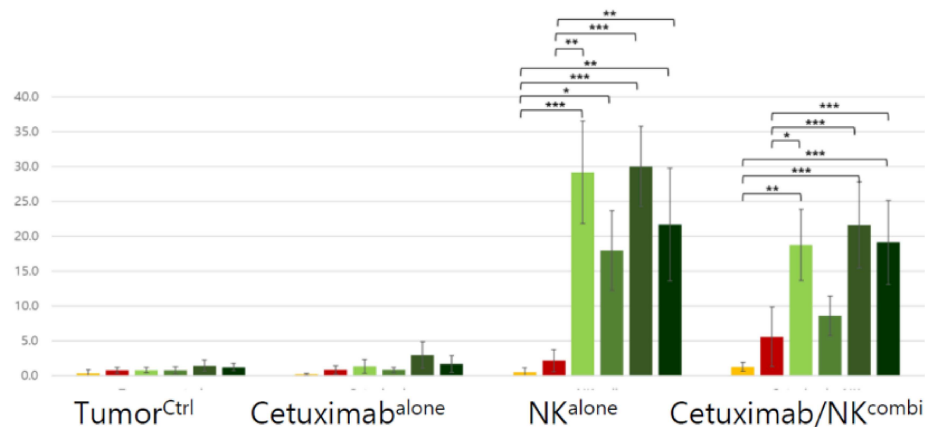**B**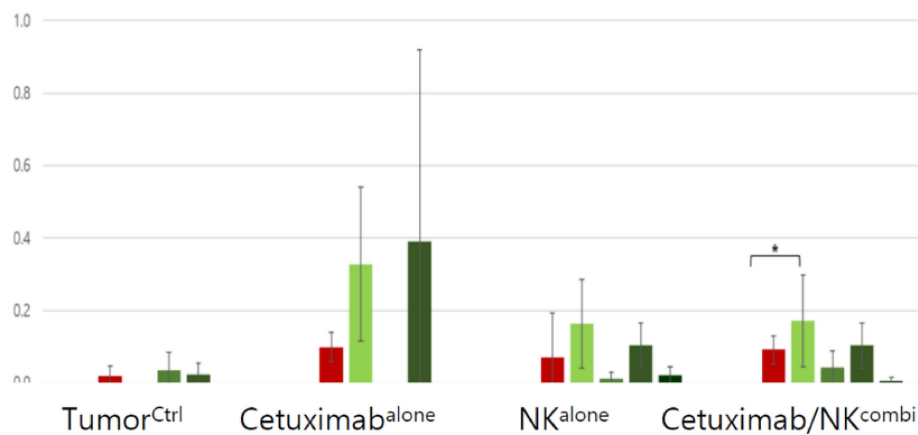

■ Before Tumorigenesis    ■ After Tumorigenesis    ■ 2<sup>nd</sup> Chemotherapy  
■ 3<sup>rd</sup> Chemotherapy    ■ 4<sup>th</sup> Chemotherapy    ■ 5<sup>th</sup> Chemotherapy

268 **Supplemental Figure 2. Changes in lymphocyte markers during tumorigenesis and**  
 269 **treatment in cell line-derived xenograft-humanized mice. (A) Pan-T-cells (CD45+/CD3+).**  
 270 **(B) T-cell subunit (CD45+/CD3+/CD8+).** (C) T-cell subunit (CD45+/CD3+/CD4+). (D) B-  
 271 cells (CD45+/CD3+/CD19-).

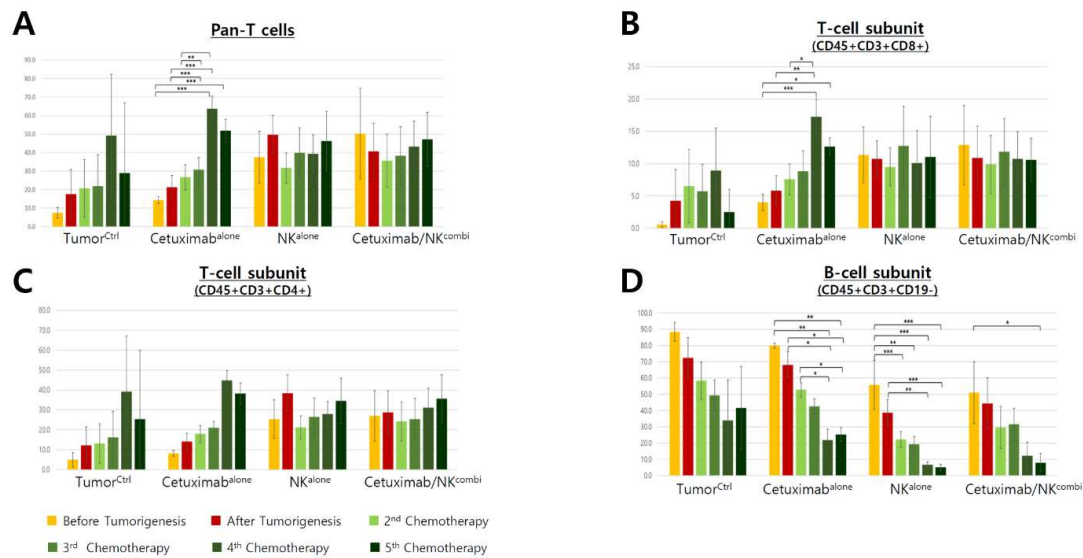

272

273 **Supplemental Figure 3. Characteristics of expanded NK cells.** (A) The percentages of  
274 CD3<sup>-</sup>CD56<sup>+</sup> NK cells in freshly isolated cells using CliniMACS microbeads (D0) and  
275 culture-expanded cells (final product) as well as the percentages of CD3<sup>+</sup> T cells, CD14<sup>+</sup>  
276 monocytes, CD20<sup>+</sup> B cells in culture-expanded NK cells were analyzed using flow cytometry.  
277 (B) The fold expansion of the total cell population after expansion culture. (C) The viability  
278 of culture-expanded NK cells. (D) The expression levels of activating receptors, inhibitory  
279 receptors, and chemokine receptors were analyzed using flow cytometry in CD56<sup>+</sup> gated cells  
280 of final products. (E) The cytotoxicity activity of expanded NK cells against the leukemia  
281 K562 cell lines was measured using calcein-release assay at E:T ratios ranging from 10:1 to  
282 0.5:1. (F) The degranulation activity of NK cells was assessed using flow cytometry by  
283 measuring the percentage of CD56<sup>+</sup>CD107a<sup>+</sup> cells during co-incubation with K562 cells  
284 (NK+K562) at an E:T ratio of 1:1. Additionally, positive control samples were included by  
285 treating NK cells with phorbol 12-myristate 13-acetate/ionomycin (NK+P/I), while negative  
286 control samples were obtained without any treatment (NK). (G) Expression of cytokines  
287 (TNF- $\alpha$  and IFN- $\gamma$ ) in expanded NK cells were analyzed by intracellular staining after  
288 incubating with (W/K562) or without (W/O K562) K562 cells. The significant difference  
289 between W/K562 and W/O K562 was observed in terms of the expression of cytokines (TNF-  
290  $\alpha$  and IFN- $\gamma$ ) in expanded NK cells (\* $p$ <0.005). Each dot in A, B, C, D, and F represents the  
291 mean value of NK cells from each patient and the horizontal bars indicate the overall mean  
292 value from 12 donors.  
293  
294

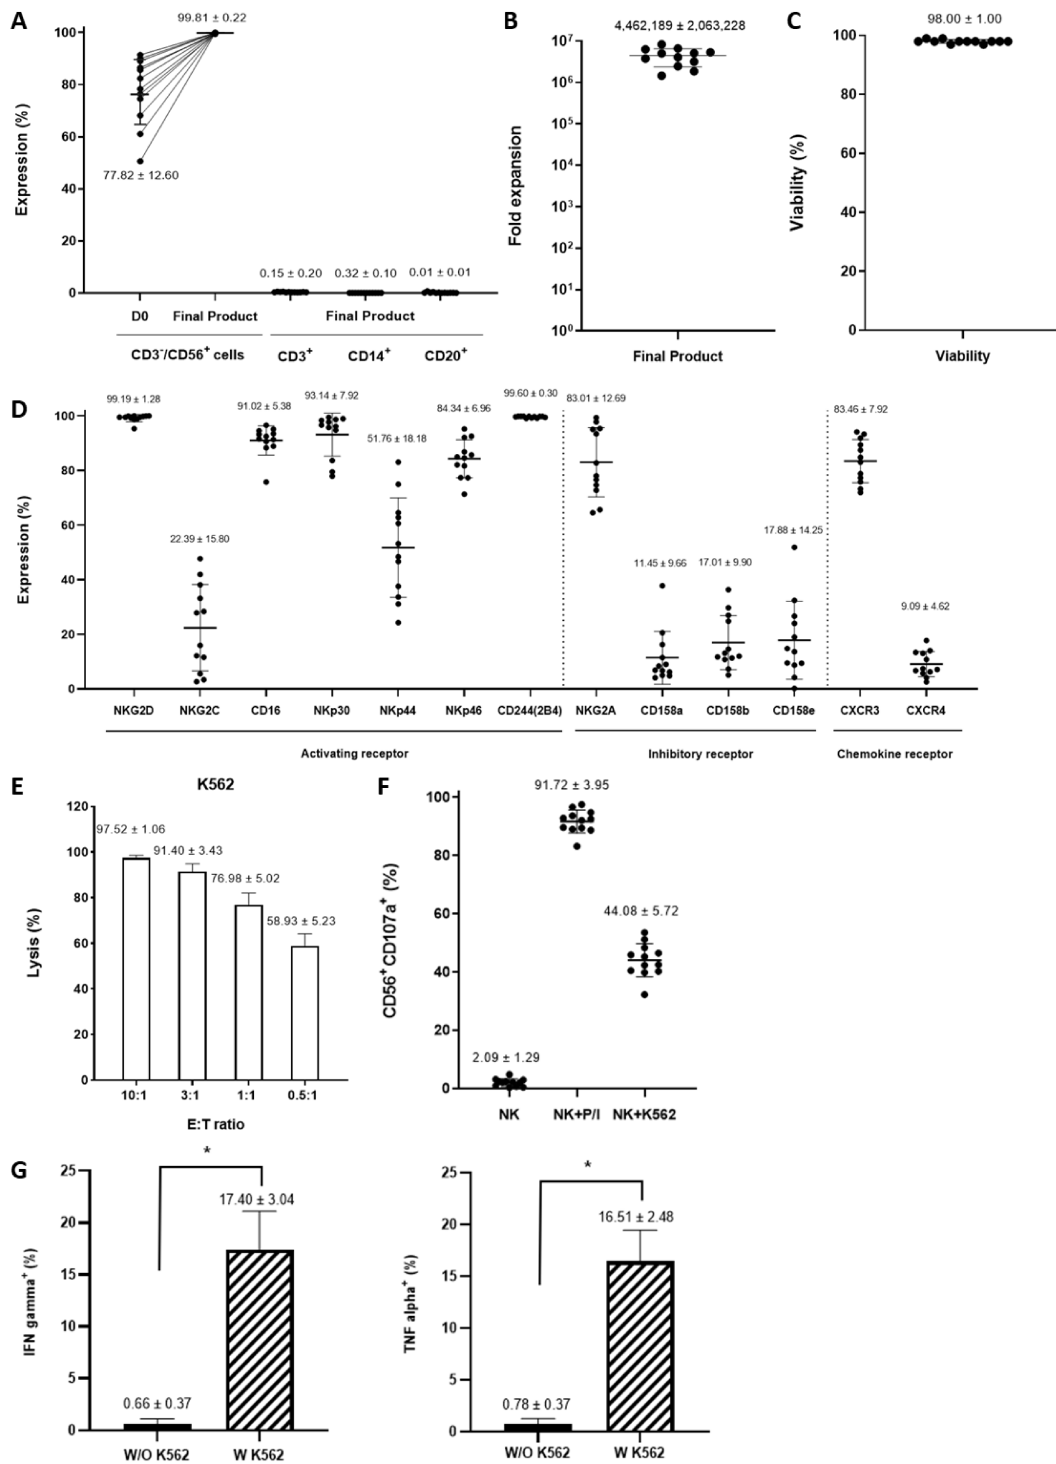

295

296

297

298 **Supplemental Figure 4. Cytotoxicity activity of expanded NK cells toward osimertinib-**  
299 **resistant and their parental NSCLC cells. NK cell cytotoxicity against parental PC-9,**  
300 **and osimertinib-resistant PC-9 (PC9/OR) cells (A) as well as parental HCC827, and**  
301 **osimertinib-resistant HCC827 (HCC827/OR) cells (B) was evaluated using the calcein**  
302 **release assay after co-culturing for 4 hours with various E:T ratios ranging from 10:1, 3:1, 1:1**  
303 **to 0.5:1). Data were shown as mean  $\pm$  SD. One-way ANOVA with Tukey's post hoc analysis**  
304 **was applied for statistical analysis. \* $p < 0.005$ , relative to each parental cell.**

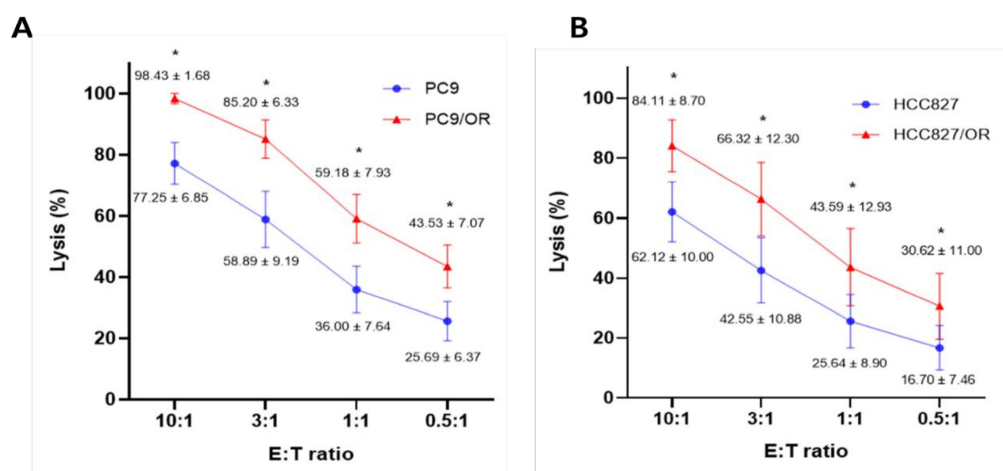

305

306



307 **Supplemental Figure 5. Cetuximab-mediated ADCC activity of expanded NK cells**  
 308 **against NSCLC cells.** (A) Parental PC-9 and osimertinib-resistant PC-9 (PC9/OR) were co-  
 309 cultured with NK cells for 2 hours at the E:T ratio of 0.5:1, 1:1 and 3:1 in the presence of  
 310 media alone (NK), isotype control IgG antibody (NK + IgG) or cetuximab (NK + Cetuximab).  
 311 (B) Cetuximab-mediated ADCC activity of expanded NK cells was measured in parental  
 312 HCC827 and osimertinib-resistant HCC827 (HCC827/OR) at the indicated E:T ratio in the  
 313 presence of media alone (NK), isotype control IgG antibody (NK + IgG) or cetuximab (NK +  
 314 Cetuximab). The cytotoxic activity of NK cells against NSCLC cells was shown as mean  $\pm$   
 315 SD. One-way ANOVA with Tukey's post hoc analysis was applied for statistical analysis.  
 316 Asterisk indicates significant statistical difference relative to NK cell only (\* $p$ <0.005, n.s: not

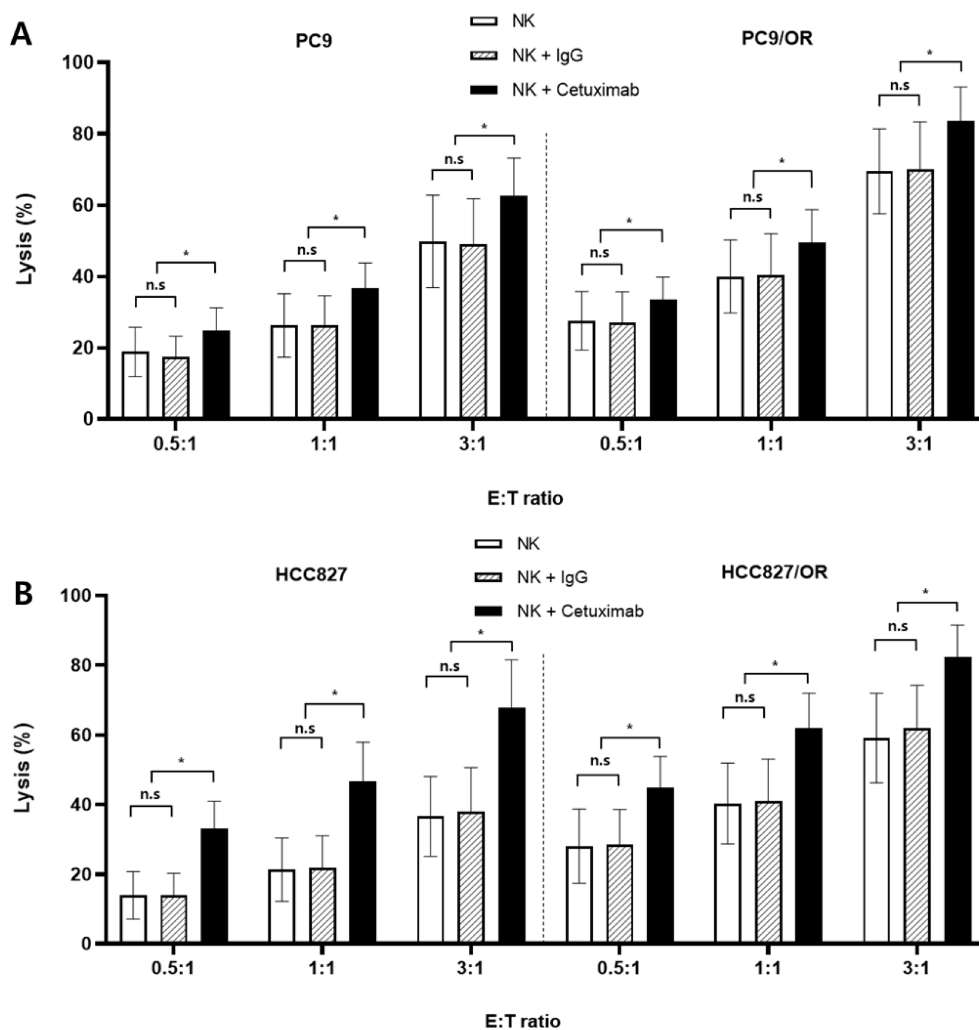

317 significant).

318

319 **Supplemental Figure 6. Changes in NK cell activity during treatment in patients with**  
320 **NSCLC receiving SNK01 (NK cells) in combination with either gemcitabine/carboplatin**

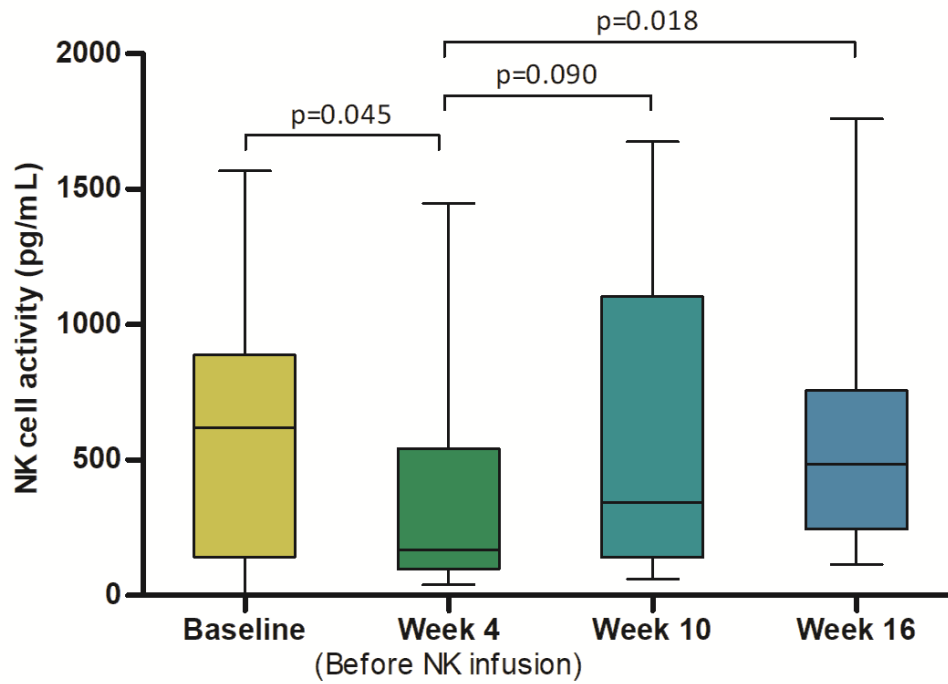

321 **or gemcitabine/carboplatin/cetuximab.**

322

323

324 **Supplemental Figure 7. Two representative cases in patients with NSCLC who received**  
325 **SNK01 in combination with gemcitabine/carboplatin/cetuximab.**

326 (A) A patient in their 50s with adenocarcinoma received SNK01 in combination with  
327 cetuximab/gemcitabine/carboplatin as a second-line treatment after developing resistance to  
328 gefitinib. (B) A patient in their 50s, who had a recurrence (confirmed by biopsy) of  
329 adenocarcinoma 2 years after left upper lobectomy, received SNK01 in combination with  
330 cetuximab/gemcitabine/carboplatin as a third-line treatment after the failure of previous  
331 gefitinib and osimertinib treatments.

**A**

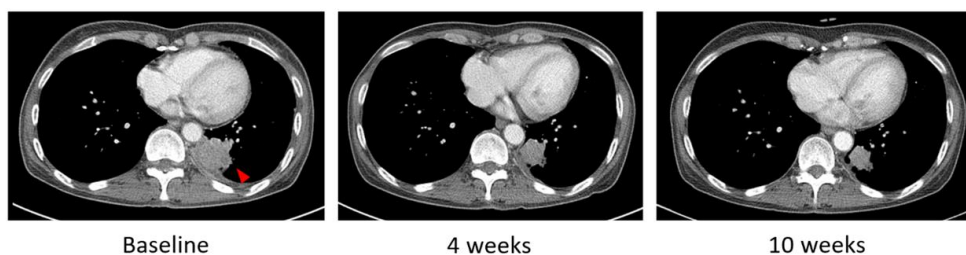

**B**

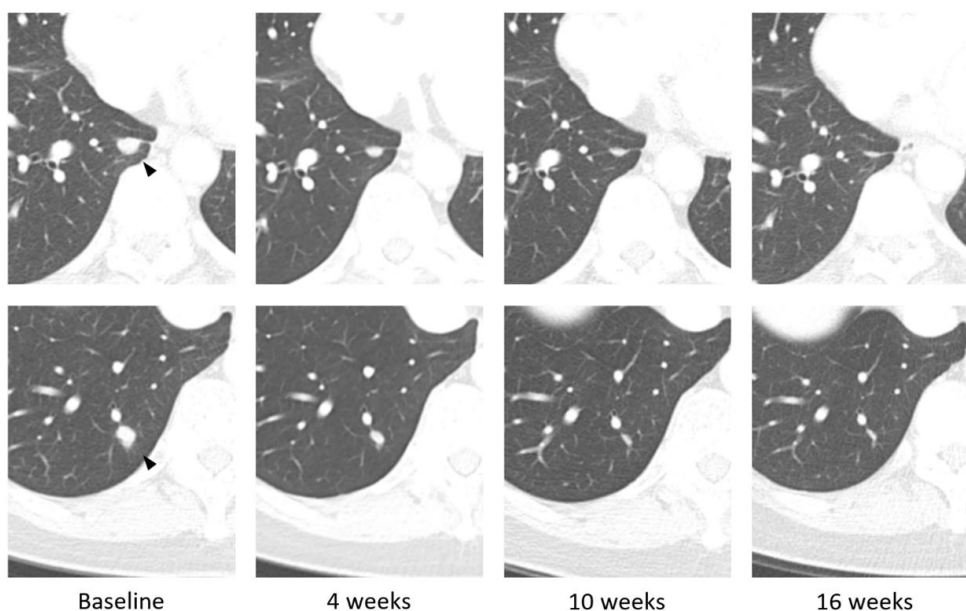

332
